# Supplementary material
Source: ML conference proceedings conference paper supplement (https://www.ecva.net/papers/eccv_2022/papers_ECCV/html/136670377_ECCV_2022_paper.php)
Supplement: Supplementary file 3 [file 136670377-supp.zip]

Archive with 4 entries (4 files):
- supp.pdf
- __MACOSX/._supp.pdf
- supp.mp4
- __MACOSX/._supp.mp4
